# Supplementary material for: 3,4-Dihydroxyphenylacetate 2,3-dioxygenase from Pseudomonas aeruginosa: An Fe(II)-containing enzyme with fast turnover
Source: PLOS journal article supplement (doi:10.1371/journal.pone.0171135), 2017-02-03
Supplement: S1 (10.1371/journal.pone.0171135.s001) [file journal.pone.0171135.s001]

# Supporting information

## (A)

|         |                                                               |     |
|---------|---------------------------------------------------------------|-----|
| CtAPD   | MQGEIIAGFLAPHPPHLVYGENPPQNEPRSQGGWEVLRWAYERARERLDAMKPDVLLVHS  | 60  |
| PaDHPAO | -MGKVALAAKITHVPSLYLSELPGPRHGCRQPAIDGHR----EIGRRCRELGVDTIIVFD  | 55  |
| KpDHPAO | -MGKLALAAKTTHVPSMYLSELPGKNHGCRQGAIDGHK----EIGKRCRELGVDTFIVFD  | 55  |
| EcDHPAO | -MGKLALAAKITHVPSMYLSELPGKNHGCRQGAIDGHK----EISKRCREMGVDTIIVFD  | 55  |
|         | *:: . * * : . * * .. * . : : . . * : *::*..                   |     |
| CtAPD   | PHWITSVGHHFLGVPESGKSVDPPIFPN---VFRYDFSLNVDVELAEACAEGRKAGLVT   | 117 |
| PaDHPAO | THWLVNAGYHINCAPHFEGLYTSNELPHFIANMEYGFP--GNPELGRI LAEGCNALGVET | 113 |
| KpDHPAO | THWLVNSAYHINCADHFQGVYTSNELPHFIRDMTYDYD--GNPELGHLIADKTVKLGVRA  | 113 |
| EcDHPAO | THWLVNSAYHINCADHFEGVYTSNELPHFIRDMTYNYE--GNPELGQLIADKALKLGVRA  | 113 |
|         | **::.. :*: . . : * .. : *: : *:: : **.. *: *:: :              |     |
| CtAPD   | KMMRNPKFRVDYGTITTLHLIRPQWDIPVVGISANNSPYLNTKEGMSEMDVLGKATREA   | 177 |
| PaDHPAO | LAHDATTLGPEYGTLPVMRYMNQDRHFQVVSVSALCTVHYLND-----SARLGWAMRKA   | 167 |
| KpDHPAO | KAHNIPSLKLDYGTLPVMRYMNADKHFKVVSISAFCTVHDFAD-----SRKLGEAIRKA   | 167 |
| EcDHPAO | KAHNIPSLKLEYGSVVPVMRYMNEDKRFKVVVSISAFCTVHDFAD-----SRKLGERIVKA | 167 |
|         | . : : **::.. : : : : : **::** : : : ** : *                    |     |
| CtAPD   | IRK-TGRKAVLLASNTLSHWHFHEEPTIPEDMSKEYPATMAGYQWDIRMIELMRQGKTSE  | 236 |
| PaDHPAO | VEEHYDGTVAFLASGSLSHRFAQ-NGQAPDFSDR-IWS-PFLEVLDHEVVQMWQEGRWAE  | 224 |
| KpDHPAO | I-EKYDGTVAFLASGSLSHRFIE-DQRAEEGMNS-YTR-EFDHQMDERVVKLWREGKFKE  | 223 |
| EcDHPAO | I-EQYDGTVAFLASGSLSHRFID-DQRAEEGMNS-YTR-EFDRQMDERVVKLWREGQFKE  | 223 |
|         | : : . ....**::**.. . . : : . * ..::: :*: *                    |     |
| CtAPD   | VFKLLPQFIDEAFAEYKSGAFTWMHAAMQYPELAAELFGYGTVIGTGNVMEWDLRKAG-   | 295 |
| PaDHPAO | FCGMLPEYASKGHGEGFMHDTAML-----LGALGWSAYDGK-----AEVVTPYFG       | 269 |
| KpDHPAO | FCTMLPENAEYCYGEGNMHDTVML-----LGLLGWDKYDGK-----EWNLSPNCL       | 268 |
| EcDHPAO | FCNMLPEYADYCYGEGNMHDTVML-----LGMLGWDKYDGK-----VWSLSPSYS       | 268 |
|         | . : **: . . * . : : *:.. *. :                                 |     |
| CtAPD   | ---LSMLGA-----ADQKQRSAAVA-----                                | 312 |
| PaDHPAO | SSGTGQINAVFPVTAQDGSAPAAQAGNPAGASCASRL                         | 307 |
| KpDHPAO | PASGTRPG-----                                                 | 276 |
| EcDHPAO | QASWHRSG-----                                                 | 276 |

## (B)

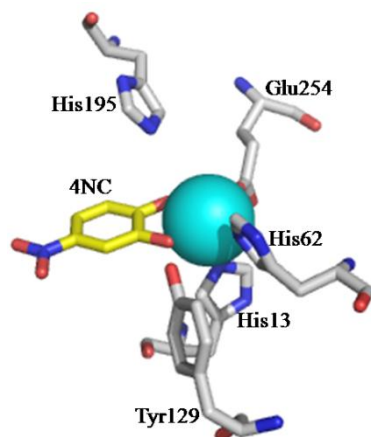

**S1 Fig. A multiple sequence alignment of PaDHPAOs and other extradiol-ring cleavage dioxygenase in Cluster 1 and Cluster 6 (referred to Clusters in Fig. 2 main text).** (A) The amino acid sequence of PaDHPAO was aligned with multiple sequences of *Klebsiella pneumoniae* (Kp) and *Escherichia coli* C (Ec) DHPAO enzymes in Cluster 1 and APD from *Comamonas testosteroni* (Ct) in Cluster 6 (A). Three amino acid residues (highlighted in yellow color) of PaDHPAO (His12, His57, and Glu239) and other DHPAOs in Cluster 1 are well conserved when compared to the CtAPD active-site residues (His13, His62, and Glu251). The other two active-site residues (highlighted in cyan, Tyr129 and His195) are also conserved in PaDHPAO (Tyr125 and His186) and other DHPAOs in Cluster 1. These two residues are important for second sphere metal-coordination and were shown to be important for catalysis [42]. (B) The active site structure of CtAPD co-crystallized with 4-nitrocatechol (4NC) shows the involvement of all these conserved residues in metal coordination and substrate binding. As these residues are conserved in PaDHPAO, it is likely that the enzyme is a member of the 2-His-1-carboxylate enzyme superfamily similar to CtAPD.
